# Supplementary material for: MicroRNAs miR-17 and miR-20a Inhibit T Cell Activation Genes and Are Under-Expressed in MS Whole Blood
Source: PubMed Central journal article supplement (PMC2920328; doi:10.1371/journal.pone.0012132), 2010-08-11
Supplement: pone.0012132.s001.pdf [file pone.0012132.s001.pdf]

**Table S1.**  
Demographics of multiple sclerosis and control individuals

|         |        | miRNA microarray  |                     |           |              |            |                                  |                                | q RT PCR          |                     |                   |              |            |                                  |                                |
|---------|--------|-------------------|---------------------|-----------|--------------|------------|----------------------------------|--------------------------------|-------------------|---------------------|-------------------|--------------|------------|----------------------------------|--------------------------------|
|         |        | number of samples | average age (years) | age range | average EDSS | EDSS range | average disease duration (years) | disease duration range (years) | number of samples | average age (years) | age range (years) | average EDSS | EDSS range | average disease duration (years) | disease duration range (years) |
| MS      | Total  | 59                | 54.2                | 32 - 81   | 4.5          | 0 - 5.8    | 20.3                             | 1 - 58                         | 57                | 53.8                | 32 - 81           | 4.4          | 0 - 8.5    | 23.1                             | 1 - 66                         |
|         | Male   | 19                | 53.1                | 32 - 66   | 5.4          | 1.5 - 8.5  | 21.7                             | 1 - 58                         | 18                | 52.7                | 32 - 66           | 5.3          | 1.5 - 8.5  | 31.1                             | 1 - 66                         |
|         | Female | 40                | 54.7                | 34 - 81   | 4.1          | 0 - 8.5    | 19.1                             | 1 - 53                         | 39                | 54.3                | 34 - 81           | 4.0          | 0 - 8.5    | 19.8                             | 1 - 62                         |
| RRMS    | Total  | 24                | 49.9                | 33 - 64   | 2.4          | 0 - 6.5    | 16.8                             | 1 - 36                         | 25                | 48.8                | 33 - 64           | 2.4          | 0 - 6.5    | 15.9                             | 1 - 36                         |
|         | Male   | 3                 | 42.3                | 33 - 52   | 3.5          | 1.5 - 6    | 13.0                             | 1 - 25                         | 3                 | 42.3                | 33 - 52           | 3.5          | 1.5 - 6    | 13.0                             | 1 - 25                         |
|         | Female | 21                | 51.0                | 35 - 64   | 2.2          | 0 - 6.5    | 17.3                             | 1 - 36                         | 22                | 49.7                | 35 - 64           | 2.3          | 0 - 6.5    | 16.3                             | 1 - 36                         |
| SPMS    | Total  | 17                | 57.2                | 34 - 73   | 6.4          | 4 - 8.5    | 23.2                             | 2 - 53                         | 14                | 56.6                | 34 - 73           | 6.5          | 4 - 8.5    | 20.6                             | 2 - 37                         |
|         | Male   | 4                 | 54.8                | 44 - 63   | 6.5          | 4 - 8.5    | 22.8                             | 21 - 26                        | 4                 | 54.8                | 44 - 63           | 6.5          | 4 - 8.5    | 22.8                             | 21 - 26                        |
|         | Female | 13                | 58.0                | 34 - 73   | 6.4          | 4 - 8.5    | 23.3                             | 2 - 53                         | 10                | 57.3                | 34 - 73           | 6.5          | 4 - 8.5    | 19.7                             | 2 - 37                         |
| PPMS    | Total  | 18                | 57.1                | 32 - 81   | 5.4          | 2 - 8      | 22.9                             | 4 - 58                         | 18                | 58.9                | 32 - 81           | 5.6          | 3.5 - 8    | 36.6                             | 4 - 66                         |
|         | Male   | 12                | 55.3                | 32 - 66   | 5.5          | 3.5 - 8    | 28.8                             | 5 - 58                         | 11                | 55.0                | 32 - 66           | 5.4          | 3.5 - 8    | 40.8                             | 5 - 66                         |
|         | Female | 6                 | 60.7                | 36 - 81   | 5.4          | 2 - 7.5    | 14.0                             | 4 - 34                         | 7                 | 64.4                | 56 - 81           | 5.9          | 5 - 7      | 31.3                             | 4 - 62                         |
| Control | Total  | 37                | 48.0                | 23 - 77   | -            | -          | -                                | -                              | 34                | 48.3                | 23 - 77           | -            | -          | -                                | -                              |
|         | Male   | 16                | 54.2                | 26 - 69   | -            | -          | -                                | -                              | 15                | 56.1                | 26 - 69           | -            | -          | -                                | -                              |
|         | Female | 21                | 43.2                | 23 - 77   | -            | -          | -                                | -                              | 19                | 42.1                | 23 - 77           | -            | -          | -                                | -                              |

MS Multiple Sclerosis; RRMS relapsing remitting MS; SPMS secondary progressive MS; PPMS primary progressive MS; EDSS Expanded disability status scale
