# Supplementary material for: MicroRNAs miR-17 and miR-20a Inhibit T Cell Activation Genes and Are Under-Expressed in MS Whole Blood
Source: PubMed Central journal article supplement (PMC2920328; doi:10.1371/journal.pone.0012132), 2010-08-11
Supplement: pone.0012132.s002.pdf [file pone.0012132.s002.pdf]

**Table S2**

Genes dysregulated in miR-17 knock-in and knock-down Jurkat transformants

| miR-17 (Jurkat DE + predicted target genes of miRNA) | MS DE mRNA + miR-17 Jurkat DE | MS DE mRNA + miR-17 (Jurkat DE + Target) |
|------------------------------------------------------|-------------------------------|------------------------------------------|
| MARCH5                                               | C17orf39                      | C17orf39                                 |
| SEPT7                                                | CAP1                          | CAP1                                     |
| AADAC                                                | CASC3                         | CASC3                                    |
| ABAT                                                 | CEBPB                         | CEBPB                                    |
| ABCD3                                                | DLST                          | FRAT1                                    |
| ABHD13                                               | DPF2                          | HLA-E                                    |
| ABL1                                                 | FRAT1                         | IDS                                      |
| ABTB1                                                | FTL                           | ITGB5                                    |
| ACAT2                                                | HIST1H2BD                     | MXD1                                     |
| ACSS2                                                | HIST1H2BK                     | MYADM                                    |
| ACTR10                                               | HLA-E                         | NINJ1                                    |
| ACVR2B                                               | IDS                           | NUMB                                     |
| ADAR                                                 | ITGB5                         | PRCP                                     |
| ADM                                                  | MXD1                          | SLBP                                     |
| ADM2                                                 | NUMB                          | TSC22D1                                  |
| ADSSL1                                               | PILRA                         | TXNIP                                    |
| AGFG2                                                | PRCP                          | UBAP1                                    |
| AKAP13                                               | PRSS7                         | UPF3B                                    |
| ALDH3A2                                              | SEC14L1                       | ZNF213                                   |
| ALKBH1                                               | SNX30                         | APOOL                                    |
| AMDHD1                                               | STAU1                         | ARMET                                    |
| AMPD2                                                | STK40                         | C6orf48                                  |
| ANKS4B                                               | STX11                         | CDKN2C                                   |
| ANXA6                                                | TSC22D1                       | COMMD3                                   |
| AP4E1                                                | TST                           | COQ5                                     |
| APOBEC3F                                             | TXNIP                         | DARS                                     |
| APOOL                                                | UBAP1                         | DUSP8                                    |
| APPL2                                                | UPF3B                         | IL23A                                    |
| ARF6                                                 | ZNF213                        | MRPS22                                   |
| ARFGEF2                                              | ASF1B                         | WDR33                                    |
| ARHGEF10                                             | CDKN1B                        | ZNF740                                   |
| ARID4B                                               | CORO1A                        | BPGM                                     |
| ARL4A                                                | MYADM                         | PTPRCAP                                  |
| ARL5B                                                | NINJ1                         | RPL32                                    |
| ARMET                                                | SLBP                          |                                          |
| ARNT2                                                | APEX1                         |                                          |
| ASL                                                  | APOOL                         |                                          |
| ATCAY                                                | ARMET                         |                                          |
| ATF3                                                 | C19orf48                      |                                          |
| ATF5                                                 | C6orf48                       |                                          |
| ATP5SL                                               | CCDC53                        |                                          |

|           |          |
|-----------|----------|
| ATP6V1H   | CCDC84   |
| ATPAF1    | CCNB1IP1 |
| ATRX      | CDKN2C   |
| ATXN7     | CHPF     |
| B3GAT1    | CIP29    |
| B3GNT1    | COMMD3   |
| BBS7      | COQ5     |
| BCL2A1    | DARS     |
| BCL2L11   | DRG1     |
| BMPR1A    | DUSP8    |
| BMPR2     | EIF2B4   |
| BPGM      | EIF3D    |
| BPTF      | HEMGN    |
| BRUNOL5   | HYLS1    |
| BTN1A1    | IL23A    |
| BZW1      | LSM5     |
| C10orf58  | MED10    |
| C11orf63  | MRFAP1L1 |
| C12orf44  | MRPS21   |
| C12orf48  | MRPS22   |
| C12orf49  | NOSIP    |
| C14orf138 | NUP37    |
| C16orf58  | RIOK2    |
| C16orf59  | RPL17    |
| C17orf39  | RPLP0    |
| C17orf48  | STK16    |
| C19orf59  | STOML2   |
| C1orf106  | WDR33    |
| C1orf107  | WDR61    |
| C1orf124  | ZNF740   |
| C1orf135  | ZNHIT3   |
| C1orf21   | ATP5J    |
| C1orf220  | BPGM     |
| C1orf9    | CDC42    |
| C1orf91   | PRDX1    |
| C1orf95   | PTPRCAP  |
| C20orf111 | RPL13A   |
| C2orf30   | RPL32    |
| C4orf3    | TAF15    |
| C4orf34   | TCEAL4   |
| C4orf49   | UQCRCF51 |
| C5orf41   |          |
| C5orf45   |          |
| C5orf51   |          |
| C6orf48   |          |
| C6orf62   |          |

C7orf26  
C7orf43  
C7orf53  
C9orf102  
C9orf72  
CACNB2  
CACNB2  
CACNB4  
CADM2  
CAMK2D  
CAP1  
CAPN3  
CAPN3  
CAPRIN2  
CAPZA1  
CASC1  
CASC3  
CAV3  
CCDC109A  
CCDC127  
CCDC150  
CCDC3  
CCDC62  
CCDC86  
CCDC90B  
CCL5  
CCL8  
CCND2  
CCRK  
CCS  
CD14  
CD163  
CD38  
CD5  
CD82  
CD83  
CDC2L5  
CDH26  
CDK8  
CDKN2C  
CDYL2  
CEBPB  
CER1  
CES3  
CH25H  
CHCHD4

CHIC1  
CHIC2  
CHRNB1  
CLEC4A  
CLSTN1  
CLUAP1  
COG3  
COG5  
COL2A1  
COMMD3  
COPS8  
COQ10B  
COQ5  
COX11  
CPEB4  
CPZ  
CRCP  
CREB3L2  
CRK  
CRMP1  
CRTAP  
CRTC1  
CRYZL1  
CSNK2A2  
CTAGE5  
CTPS2  
CUX2  
CXCL12  
CXorf1  
CYTIP  
DAG1  
DARS  
DCDC2  
DCLRE1C  
DDHD1  
DDX17  
DEDD  
DENND5A  
DGUOK  
DGUOK  
DHRS2  
DHX57  
DIABLO  
DKK2  
DLEC1  
DLG5

DMD  
DNAJB5  
DNAJB6  
DNAJB9  
DNAJC27  
DNALI1  
DNASE2  
DNMT3A  
DNMT3A  
DOCK4  
DPY19L4  
DRD2  
DUOX1  
DUSP8  
DUT  
DUXA  
DYNC111  
DYRK3  
DZIP3  
EBF1  
EFHA2  
EFTUD1  
EHMT1  
EIF1AX  
EIF2B2  
ELMO1  
ELMOD3  
EML1  
EMP1  
ENO3  
ERO1L  
ERO1LB  
ESRRG  
ETV3L  
ETV5  
EVI1  
EXOC7  
FADS1  
FAM123A  
FAM12B  
FAM165B  
FAM19A4  
FAM24B  
FAM38B2  
FAM63A  
FAM71E1

FAM82A2  
FBLIM1  
FBXO22  
FBXO41  
FBXW8  
FCF1  
FEN1  
FLJ41603  
FMNL3  
FMO5  
FNBP4  
FOXD4L2  
FOXO1  
FOXP4  
FRAT1  
FUNDC1  
GABARAPL1  
GABRA1  
GABRB2  
GADD45B  
GALK2  
GAS8  
GBF1  
GBP6  
GDAP1  
GDF6  
GGPS1  
GIMAP2  
GIMAP4  
GLT25D2  
GM2A  
GNAO1  
GNG7  
GOT1  
GPATCH8  
GPR83  
GPR89A  
GRB10  
GRB2  
GRLF1  
H1F0  
HAUS1  
HAUS2  
HBEGF  
HBP1  
HDDC3

HES7  
HIF3A  
HINT3  
HIP1  
HLA-E  
HMGA1  
HMGCS1  
HOMEZ  
HOOK3  
HOXC6  
HPS4  
HRH1  
HSH2D  
HTN1  
HTR7  
HVCN1  
HYOU1  
IDS  
IFI44L  
IFIT3  
IFNA17  
IFT140  
IGF1  
IGF2BP1  
IGFBP5  
IGSF3  
IL23A  
INA  
ING1  
ING4  
INO80D  
INSIG1  
INSM2  
IPO13  
ISX  
ITGB5  
ITM2C  
ITPR1  
JAG2  
JOSD1  
KCNAB1  
KCNH5  
KCNH7  
KCNJ10  
KCNK3  
KCNMA1

KCNMB2  
KDM3B  
KHDC1  
KHK  
KIAA0774  
KIAA1370  
KIF3B  
KLC4  
KLF10  
KLHL2  
KLHL25  
KLHL28  
KLK5  
KLK7  
KLRD1  
KRBA2  
L3MBTL4  
LAMA3  
LARP2  
LATS2  
LDLR  
LEPREL1  
LEPROTL1  
LIAS  
LIF  
LILRB3  
LIMA1  
LIPH  
LMBRD1  
LRRC1  
LSS  
LYPD5  
LYPD6  
LYZ  
MAGEA5  
MAP2K3  
MARVELD3  
MATN3  
MCFD2  
MFAP3L  
MFAP5  
MLC1  
MLF2  
MMP2  
MPHOSPH8  
MPP5



MRAP2  
MRGPRX3  
MRPL4  
MRPS22  
MRRF  
MST150  
MTMR14  
MTPAP  
MTUS1  
MUC17  
MUDENG  
MUT  
MVD  
MXD1  
MYADM  
MYO1E  
MYOM2  
NAIF1  
NAP1L2  
NAP5  
NCAPG2  
NCBP2  
NCOA5  
NDUFV3  
NFATC2IP  
NGFRAP1  
NINJ1  
NLRP3  
NME6  
NMNAT2  
NMUR1  
NOVA2  
NRXN1  
NSFL1C  
NSL1  
NUDT16  
NUFIP1  
NUMB  
NUP54  
OGT  
OPTN  
OR7D2  
ORAOV1  
ORC5L  
OSM  
OXCT1

PASD1  
PASK  
PAX8  
PBOV1  
PCDH10  
PCDHGC3  
PCDHGC3  
PCGF6  
PDCD6  
PDE1A  
PDGFRA  
PEX13  
PEX16  
PEX19  
PGBD5  
PGM1  
PHC3  
PHF17  
PHF21A  
PHYHIP  
PIWIL2  
PKNOX1  
PLCXD2  
PLEKHO2  
PLGLB1  
PLS1  
PMEPA1  
PMM1  
PNPLA3  
POLDIP2  
POLDIP3  
POLE  
PPARA  
PPP1R1C  
PPP1R3F  
PPP2R2A  
PPP3CA  
PPP4R1  
PPP4R2  
PRCP  
PREPL  
PRKACB  
PRKCE  
PRNP  
PRR16  
PRRC1

PRSS16  
PSD  
PTBP2  
PTEN  
PTGER3  
PTK2  
PTP4A1  
PTPRCAP  
PUM1  
PUS7L  
RAB11FIP4  
RAB14  
RAB30  
RAB3GAP1  
RAB43  
RALB  
RANBP17  
RASA1  
RBAK  
RBM16  
RCN2  
RCOR2  
REL  
REPS2  
REXO1L1  
RFC3  
RFFL  
RFFL  
RG9MTD3  
RGS3  
RHBDD2  
RIT1  
RNASE6  
RNF144B  
RNF213  
RNF215  
RNF34  
RNF8  
ROBO1  
RORA  
RORA  
RP4-691N24.1  
RPL32  
RPL32  
RPS6KA2  
RRM2

RUFY1  
RUNDC3A  
RUNX2  
RYBP  
S100PBP  
SAMD7  
SAR1A  
SAV1  
SBK1  
SC5DL  
SCAMP5  
SCIN  
SDAD1  
SDC4  
SDHC  
SDSL  
SEMA3A  
SEMA4G  
SEMG2  
SERPINB3  
SERPINE2  
SETD2  
SETD4  
SFMBT1  
SGK3  
SGSM1  
SH3BP5  
SH3GLB1  
SIDT1  
SIRT6  
SLBP  
SLC16A7  
SLC19A2  
SLC22A8  
SLC28A2  
SLC2A9  
SLC34A2  
SLC43A3  
SLC4A4  
SLK  
SMAD7  
SMOX  
SMYD2  
SNCA  
SND1  
SNIP

SNTB2  
SNX22  
SNX7  
SOBP  
SOCS4  
SOS2  
SPATA2  
SPCS2  
SPRR2F  
SRBD1  
SRR  
SS18  
SSH1  
SSTR2  
SSU72  
ST6GAL1  
ST8SIA5  
STAR  
STARD10  
STAT5A  
STC2  
STIM1  
STYXL1  
SUPT4H1  
SYN1  
SYN2  
TAF12  
TAGAP  
TBC1D19  
TBC1D2  
TBC1D3C  
TCF7L2  
TCTEX1D1  
TEK  
TFE3  
TFEB  
TFPI2  
TGIF2  
TGOLN2  
THYN1  
TICAM2  
TIPARP  
TLR8  
TMEM14C  
TMEM167B  
TMEM22

TMEM62  
TMEM64  
TMEM71  
TMEM87A  
TMEM9  
TMEM98  
TMEM9B  
TMTC4  
TMUB2  
TNFAIP8L1  
TNFRSF17  
TNFSF14  
TNFSF4  
TOPORS  
TP53INP1  
TPD52  
TPK1  
TPM3  
TPMT  
TPP2  
TRAFD1  
TRAK1  
TRHDE  
TRIB3  
TRIM4  
TRNP1  
TRPC1  
TSC22D1  
TSC22D1  
TSEN34  
TSPYL6  
TXNIP  
UBAP1  
UBE2A  
UBE2G2  
UBL3  
UBOX5  
UGT2B15  
UGT2B17  
ULK3  
UNC13C  
UPF3B  
UQCR  
USP21  
USP35  
USP48

USP53  
VANGL1  
VAPB  
VPS25  
VPS33B  
VPS45  
WDR31  
WDR33  
WNK3  
XBP1  
XKR6  
XKR8  
XPC  
XPR1  
YWHAH  
ZBTB41  
ZBTB46  
ZCCHC14  
ZDHHC11  
ZFAND3  
ZFP82  
ZHX2  
ZKSCAN1  
ZMAT5  
ZNF177  
ZNF211  
ZNF213  
ZNF256  
ZNF323  
ZNF395  
ZNF419  
ZNF517  
ZNF546  
ZNF615  
ZNF620  
ZNF680  
ZNF695  
ZNF740  
ZNF750  
ZNF761  
ZNF773  
ZNF823  
ZSWIM4  
ZZZ3

DE - differential expression; MS - Multiple Sclerosis; red – up-regulated in MS; black – down-regulated in MS
