# Supplementary material for: MicroRNAs miR-17 and miR-20a Inhibit T Cell Activation Genes and Are Under-Expressed in MS Whole Blood
Source: PubMed Central journal article supplement (PMC2920328; doi:10.1371/journal.pone.0012132), 2010-08-11
Supplement: pone.0012132.s004.pdf [file pone.0012132.s004.pdf]

**Table S4**

Gene networks implicated in Multiple Sclerosis (MS) pathogenesis from miR-17 knock-in and -down experiments and from mRNA expression in whole blood

| Pathway                                                                                            | P Value  | No. Genes Represented | No. Genes on Pathway | No. Genes in miRNA list |
|----------------------------------------------------------------------------------------------------|----------|-----------------------|----------------------|-------------------------|
| <b>miR-17 Jurkat differential expression, miR-17 target genes, MS mRNA differential expression</b> |          |                       |                      | <b>34</b>               |
| Immune response_IL-17 signalling pathways                                                          | 7.82E-03 | 2                     | 205                  |                         |
| <b>miR-17 Jurkat differential expression, MS mRNA differential expression</b>                      |          |                       |                      | <b>82</b>               |
| Vitamin B7 (biotin) metabolism                                                                     | 3.78E-10 | 7                     | 99                   |                         |
| Signal transduction_Activin A signalling regulation                                                | 8.54E-08 | 7                     | 216                  |                         |
| Translation_Regulation of translation initiation                                                   | 3.48E-06 | 7                     | 376                  |                         |
| Translation_(L)-selenoaminoacids incorporation in proteins during translation                      | 3.11E-04 | 5                     | 349                  |                         |
| <b>miR-17 Jurkat differential expression, miR-17 target genes</b>                                  |          |                       |                      | <b>683</b>              |
| Development_Transactivation of PDGFR in non-neuronal cells by Dopamine D2 receptor                 | 3.64E-04 | 8                     | 143                  |                         |
| Development_A2B receptor: action via G-protein alpha s                                             | 3.80E-04 | 9                     | 181                  |                         |
| Aspartate and asparagine metabolism                                                                | 9.18E-04 | 5                     | 62                   |                         |
| Chemotaxis_CXCR4 signalling pathway                                                                | 9.35E-04 | 8                     | 165                  |                         |
| Cholesterol Biosynthesis                                                                           | 9.88E-04 | 5                     | 63                   |                         |
| Membrane-bound ESR1: interaction with G-proteins signalling                                        | 1.34E-03 | 9                     | 216                  |                         |
| Development_Angiopoietin - Tie2 signalling                                                         | 1.55E-03 | 7                     | 139                  |                         |
| Development_A3 receptor signalling                                                                 | 1.71E-03 | 9                     | 224                  |                         |
| Transcription_CREB pathway                                                                         | 2.90E-03 | 10                    | 289                  |                         |
| Development_IGF-1 receptor signalling                                                              | 3.32E-03 | 8                     | 202                  |                         |
| Cytoskeleton remodeling_FAK signalling                                                             | 3.42E-03 | 8                     | 203                  |                         |
| HIV-1 signalling via CCR5 in macrophages and T lymphocytes                                         | 3.57E-03 | 6                     | 121                  |                         |
| Development_EGFR signalling pathway                                                                | 3.96E-03 | 8                     | 208                  |                         |
| Immune response_Role of integrins in NK cells cytotoxicity                                         | 4.70E-03 | 6                     | 128                  |                         |
| Thiamine metabolism                                                                                | 4.93E-03 | 2                     | 9                    |                         |
| <b>miR-17 Jurkat differential expression</b>                                                       |          |                       |                      | <b>2187</b>             |
| Development_Flt3 signalling                                                                        | 1.47E-04 | 14                    | 157                  |                         |
| Development_A2B receptor: action via G-protein alpha s                                             | 1.95E-04 | 15                    | 181                  |                         |
| Immune response_CD137 signalling in immune cell                                                    | 1.98E-04 | 11                    | 106                  |                         |
| Development_EGFR signalling pathway                                                                | 2.84E-04 | 16                    | 208                  |                         |
| Apoptosis and survival_Endoplasmic reticulum stress response pathway                               | 1.14E-03 | 13                    | 171                  |                         |
| Cholesterol Biosynthesis                                                                           | 1.89E-03 | 7                     | 63                   |                         |
| Development_Transactivation of PDGFR in non-neuronal cells by Dopamine D2 receptor                 | 2.41E-03 | 11                    | 143                  |                         |
| Immune response_Role of DAP12 receptors in NK cells                                                | 3.35E-03 | 12                    | 171                  |                         |
| G-protein signaling_Ras family GTPases in kinase cascades (scheme)                                 | 3.81E-03 | 8                     | 90                   |                         |
