# Supplementary material for: MicroRNAs miR-17 and miR-20a Inhibit T Cell Activation Genes and Are Under-Expressed in MS Whole Blood
Source: PubMed Central journal article supplement (PMC2920328; doi:10.1371/journal.pone.0012132), 2010-08-11
Supplement: pone.0012132.s005.pdf [file pone.0012132.s005.pdf]

**Table S5**

Gene networks implicated in Multiple Sclerosis (MS) pathogenesis from miR-20a knock-in and -down experiments and from mRNA expression in whole blood

| Pathway                                                                                                  | P Value  | No. Genes Represented | No. Genes on Pathway | No. Genes in miRNA list |
|----------------------------------------------------------------------------------------------------------|----------|-----------------------|----------------------|-------------------------|
| <b>miR-20a Jurkat differential expression, miR-20a target genes, and MS mRNA differential expression</b> |          |                       |                      | <b>31</b>               |
| Transcription_Sin3 and NuRD in transcription regulation                                                  | 3.11E-06 | 4                     | 150                  |                         |
| Immune response_Antiviral actions of Interferons                                                         | 3.46E-06 | 4                     | 154                  |                         |
| Immune response_TLR3 and TLR4 induce TICAM1-specific signaling pathway                                   | 2.85E-05 | 3                     | 88                   |                         |
| Immune response_IFN alpha/beta signaling pathway                                                         | 3.36E-05 | 3                     | 93                   |                         |
| Immune response_Innate immunity response to RNA viral infection                                          | 7.92E-05 | 3                     | 124                  |                         |
| Signal transduction_Activin A signaling regulation                                                       | 4.06E-04 | 3                     | 216                  |                         |
| G-protein signaling_Ras family GTPases in kinase cascades (scheme)                                       | 1.66E-03 | 2                     | 90                   |                         |
| Cell cycle_Chromosome condensation in prometaphase                                                       | 1.84E-03 | 2                     | 95                   |                         |
| Apoptosis and survival_Cytoplasmic/mitochondrial transport of proapoptotic proteins Bid, Bmf and Bim     | 1.92E-03 | 2                     | 97                   |                         |
| Cell cycle_Sister chromatid cohesion                                                                     | 2.08E-03 | 2                     | 101                  |                         |
| Regulation of lipid metabolism_Regulation of lipid metabolism via LXR, NF-Y and SREBP                    | 2.25E-03 | 2                     | 105                  |                         |
| Development_Glucocorticoid receptor signaling                                                            | 2.78E-03 | 2                     | 117                  |                         |
| Transcription_Ligand-dependent activation of the ESR1/SP pathway                                         | 3.62E-03 | 2                     | 134                  |                         |
| Transcription_Role of heterochromatin protein 1 (HP1) family in transcriptional silencing                | 3.67E-03 | 2                     | 135                  |                         |
| Cell cycle_Initiation of mitosis                                                                         | 4.00E-03 | 2                     | 141                  |                         |
| Cell cycle_Role of Nek in cell cycle regulation                                                          | 5.24E-03 | 2                     | 162                  |                         |
| <b>miR-20a Jurkat differential expression and MS mRNA differential expression</b>                        |          |                       |                      | <b>93</b>               |
| Translation_Regulation of translation initiation                                                         | 6.16E-14 | 14                    | 376                  |                         |
| Signal transduction_Activin A signaling regulation                                                       | 1.15E-12 | 11                    | 216                  |                         |
| Translation_(L)-selenoaminoacids incorporation in proteins during translation                            | 1.05E-11 | 12                    | 349                  |                         |
| Vitamin B7 (biotin) metabolism                                                                           | 1.69E-09 | 7                     | 99                   |                         |
| Immune response_Antiviral actions of Interferons                                                         | 8.89E-07 | 6                     | 154                  |                         |
| Transcription_Sin3 and NuRD in transcription regulation                                                  | 1.60E-05 | 5                     | 150                  |                         |
| Immune response_TLR3 and TLR4 induce TICAM1-specific signaling pathway                                   | 8.28E-04 | 3                     | 88                   |                         |
| Immune response_IFN alpha/beta signaling pathway                                                         | 9.72E-04 | 3                     | 93                   |                         |
| Immune response_Innate immunity response to RNA viral infection                                          | 2.22E-03 | 3                     | 124                  |                         |
| Transcription_Ligand-dependent activation of the ESR1/SP pathway                                         | 2.76E-03 | 3                     | 134                  |                         |
| Immune response_Immunological synapse formation                                                          | 3.32E-03 | 4                     | 294                  |                         |

|                                                                                                      |          |    |     |             |
|------------------------------------------------------------------------------------------------------|----------|----|-----|-------------|
| Development_NOTCH1-mediated pathway for NF-KB activity modulation                                    | 5.03E-03 | 3  | 166 |             |
| Development_Notch Signaling Pathway                                                                  | 6.10E-03 | 3  | 178 |             |
| Transport_Macropinocytosis regulation by growth factors                                              | 8.50E-03 | 3  | 201 |             |
| <b>miR-20a Jurkat differential expression and miR-20a target genes</b>                               |          |    |     | <b>914</b>  |
| Cholesterol Biosynthesis                                                                             | 7.23E-05 | 7  | 63  |             |
| Regulation of lipid metabolism_RXR-dependent regulation of lipid metabolism via PPAR, RAR and VDR    | 7.10E-04 | 6  | 66  |             |
| DNA damage_NHEJ mechanisms of DSBs repair                                                            | 1.05E-03 | 6  | 71  |             |
| Transcription_Ligand-dependent activation of the ESR1/SP pathway                                     | 1.61E-03 | 8  | 134 |             |
| Regulation of lipid metabolism_Regulation of lipid metabolism via LXR, NF-Y and SREBP                | 1.66E-03 | 7  | 105 |             |
| Cell cycle_Start of DNA replication in early S phase                                                 | 4.04E-03 | 7  | 123 |             |
| Apoptosis and survival_Cytoplasmic/mitochondrial transport of proapoptotic proteins Bid, Bmf and Bim | 5.07E-03 | 6  | 97  |             |
| <b>miR-20a Jurkat differential expression</b>                                                        |          |    |     | <b>2741</b> |
| Cholesterol Biosynthesis                                                                             | 1.14E-05 | 11 | 63  |             |
| Translation_Regulation of translation initiation                                                     | 1.90E-04 | 28 | 376 |             |
| Regulation of lipid metabolism_Regulation of lipid metabolism via LXR, NF-Y and SREBP                | 1.21E-03 | 11 | 105 |             |
| Translation_Insulin regulation of translation                                                        | 2.21E-03 | 14 | 165 |             |
| Cell cycle_Spindle assembly and chromosome separation                                                | 2.56E-03 | 19 | 262 |             |
| Translation_(L)-selenoaminoacids incorporation in proteins during translation                        | 3.30E-03 | 23 | 349 |             |
| Development_Flt3 signalling                                                                          | 3.84E-03 | 13 | 157 |             |
